# Supplementary material for: PLGA-coated methylene blue nanoparticles for photoacoustic imaging and photodynamic/photothermal cascaded precisely synergistic therapy of tumor
Source: Royal Society of Chemistry journal article supplement (doi:10.1039/d1ra07689b), 2022-01-01
Supplement: d1ra07689b1.pdf [file d1ra07689b1.pdf]

# Supporting Information

1

2

## 3 **PLGA-coated Methylene Blue Nanoparticles for Photoacoustic** 4 **Imaging and Photodynamic/Photothermal Cascaded Precisely** 5 **Synergistic Therapy of Tumor**

6 Xiaomu Xu, <sup>†12</sup> Haiyan Wu, <sup>†1</sup> Yue Yang,<sup>1</sup> Bo Liu,<sup>1</sup> Jijing Tian,<sup>1</sup> Huihui Bao,<sup>3</sup> Tianlong Liu\*<sup>1</sup>

7 1, College of Veterinary Medicine, China Agricultural University, No.2 West Road Yuanmingyuan,  
8 Beijing 100193, P.R. China.

9 2, College of Chemistry and Materials Science, Jinan University, No. 601, West Huangpu Avenue,  
10 Guangzhou, Guangdong 510632, China.

11 3, China National center for food safety risk assessment, No.37, Guangqu Road, Chaoyang District,  
12 Beijing 100022, P.R. China.

13 † These authors contributed equally.

14 Correspondence: Tianlong Liu

15 Email: liutianlong@cau.edu.cn

16

## 17 **Supporting Information**

18

19

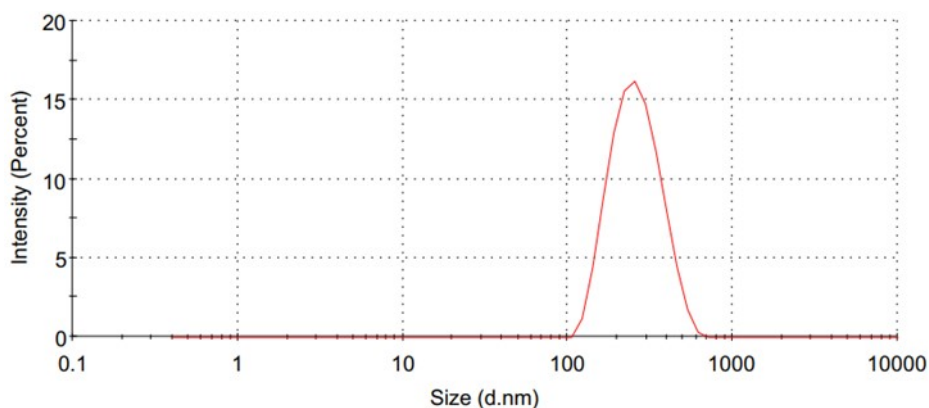

20

21 Figure S1. The DLS analysis of MBNPs in water.

22

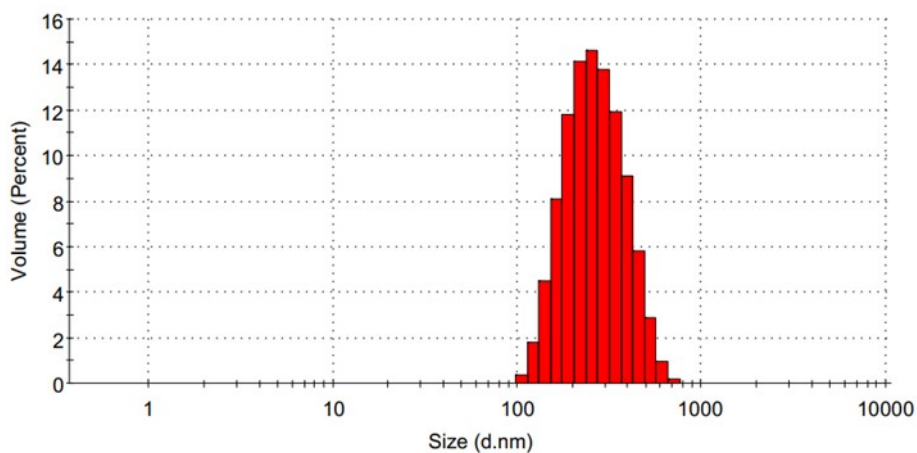

23

24 Figure S2. Hydration diameter distribution of MBNPs in water.

25

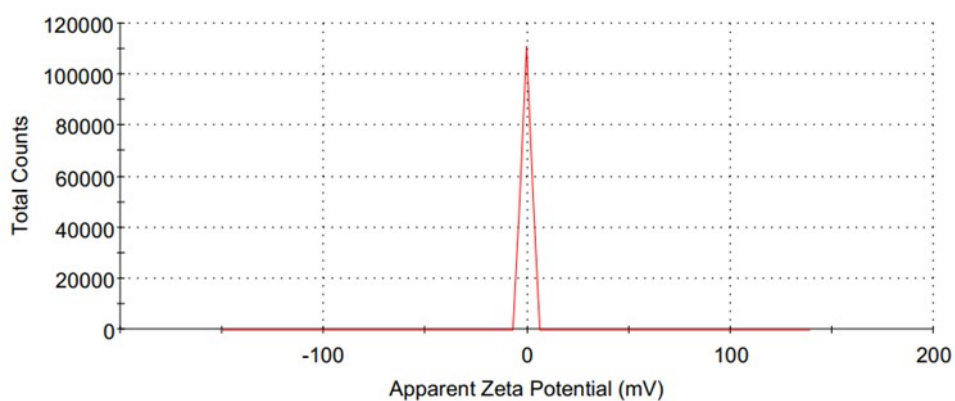

26

27 Figure S3. Zeta of MBNPs in pure water.

28

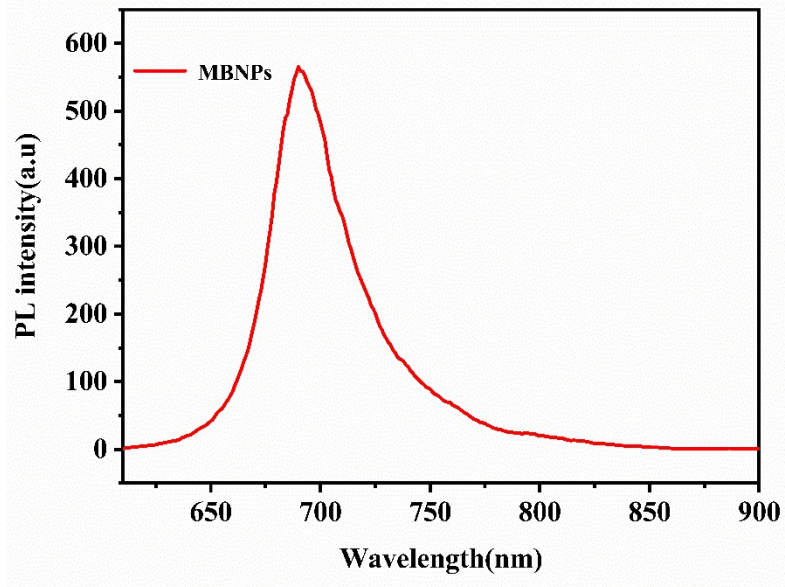

29

30 Figure S4. UV-Vis spectrum of MBNPs.

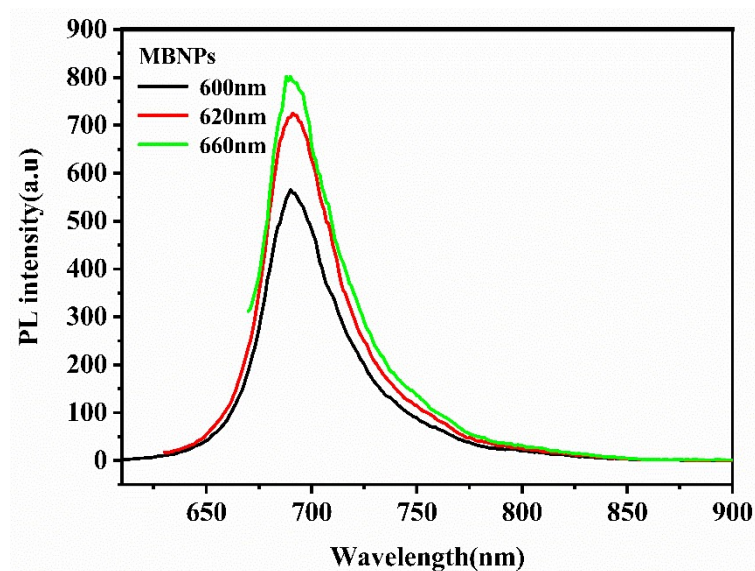

31

32 Figure S5. Normalized UV-Vis spectra of MBNPs in aqueous solution.

33

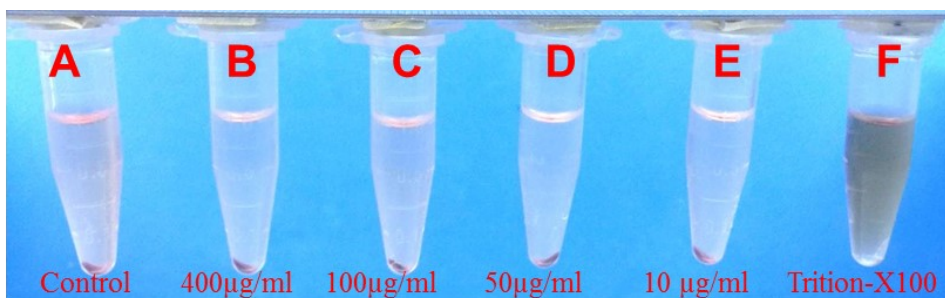

34

35 Figure S6. Hemolysis of red blood cells (RBCs) treated with control,

36 MBNPs (3.125, 6.25, 12.5, 25, 50, 100, and 200  $\mu\text{g mL}^{-1}$ ) and Triton-  
37 X100 solution.

38

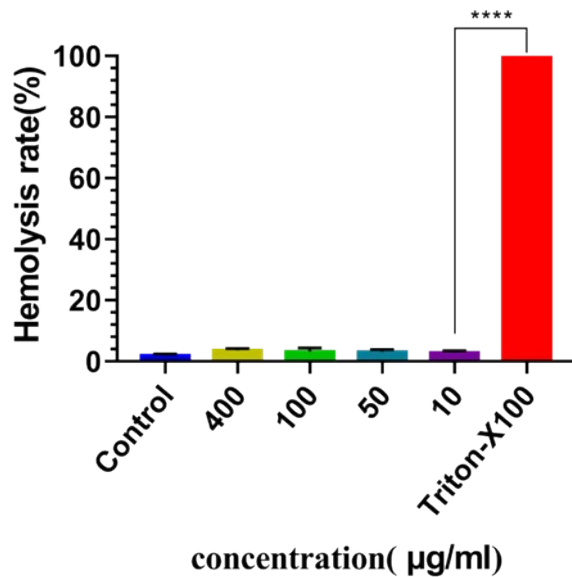

39

40

41 Figure S7. Hemolysis percentage of red blood cells (RBCs) treated with  
42 MBNPs solution.

43

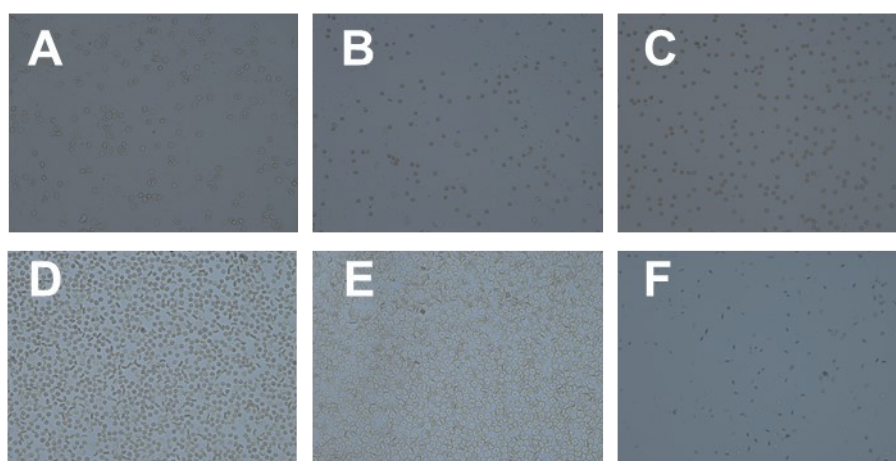

44

45 Figure S8. The photograph under a microscope of red blood cells (RBCs) .

46

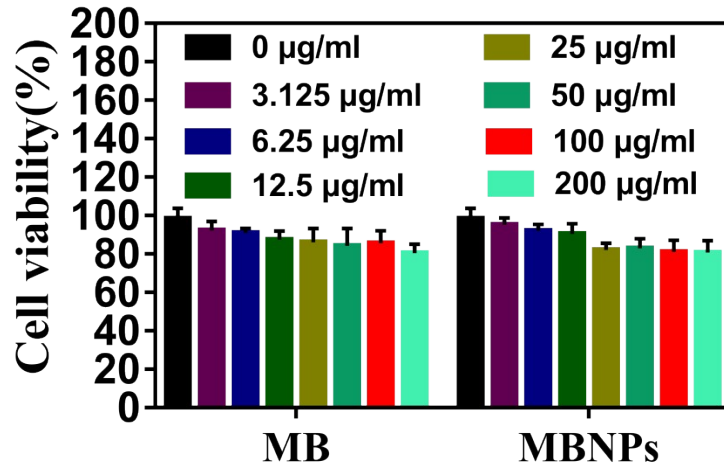

47

48 Figure S9. Relative cell viability of 4T1 cells after 24 h incubation with  
 49 MBNPs (3.125, 6.25, 12.5, 25, 50, 100, and 200  $\mu\text{g mL}^{-1}$ ).

50

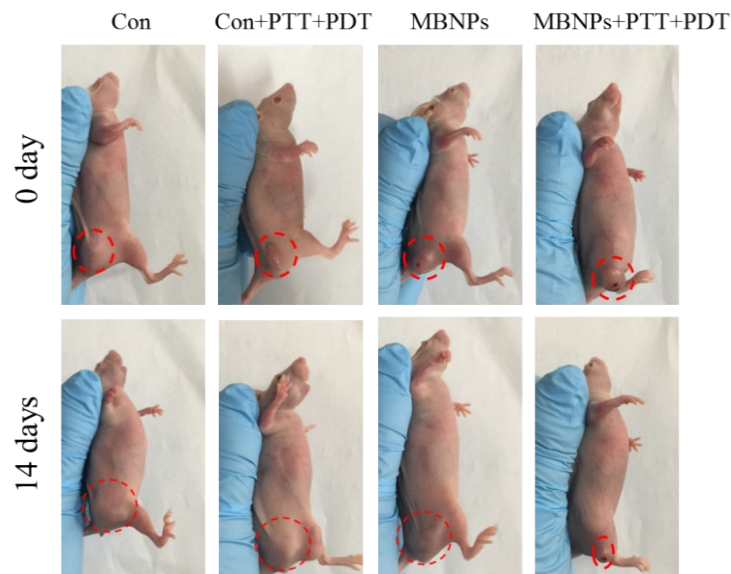

51

52 Figure S10. Representative digital photos of tumor-bearing mice before  
 53 and after different therapies. The mice were treated with control group,  
 54 injection of saline with 660 nm and 808 nm laser irradiation, injection of  
 55 MBNPs without laser irradiation, injection of MBNPs with vitamin C (VC)  
 56 irradiated by 660 nm and 808 nm laser. The relative tumor volume.

57

58

59
